# Supplementary material for: Clinical Role of ASCT2 (SLC1A5) in KRAS-Mutated Colorectal Cancer
Source: MDPI journal article supplement (doi:10.3390/ijms18081632), 2017-07-27
Supplement: s1 [file s1]

**Table S1: Primer sequence for qRT-PCT**

| Gene name |         | Primer sequence       |
|-----------|---------|-----------------------|
| ACTB      | forward | GCAAAGACCTGTACGCCAAC  |
| ACTB      | reverse | ACATCTGCTGGAAGGTGGAC  |
| KRAS      | forward | AGGCCTGCTGAAAATGACTG  |
| KRAS      | reverse | TGACCTGCTGTGTCGAGAAT  |
| SLC1A5    | forward | AAGCACATCAGCCGTTTCAT  |
| SLC1A5    | reverse | AGTGAGGACACCTCCAGCAG  |
| SLC1A4    | forward | ACGCAGGACAGATTTTCACC  |
| SLC1A4    | reverse | GAGGCAGGTCATGAGTAGGC  |
| SLC7A5    | forward | GTGTGTGATGACGCTGCTCT  |
| SLC7A5    | reverse | GCCAGGATGAAGAACACAGG  |
| SLC7A11   | forward | ACCATTCCCCTTGCAATATG  |
| SLC7A11   | reverse | CCAGTAGCCGCTCAGAAAAG  |
| SLC3A2    | forward | TCCAGGTTCGGGACATAGAG  |
| SLC3A2    | reverse | TGGATTTCGAGTAGGCTCAGG |
| SLC43A1   | forward | ACATGGCTGCTGTGAACAAG  |
| SLC43A1   | reverse | AGGTGAGAAGGCACAACAGC  |
| SLC38A1   | forward | CTGGCAAACACTGGAATCCT  |
| SLC38A1   | reverse | TCCCCCAGCTTTTCATACAC  |
| SLC38A2   | forward | CCACCTTAACACAGCCAACA  |
| SLC38A2   | reverse | ATGGGAAGAACAGCAGGATG  |
| SLC38A3   | forward | CACACCTACAGCAAGGTGGA  |
| SLC38A3   | reverse | GCTGAACTCCTGGTTTGGAA  |
| SLC38A5   | forward | GCTCACAGCAACCTTTGGAT  |
| SLC38A5   | reverse | ATAGGGAACAGCACGACTGG  |
| SLC25A22  | forward | CCAACGACTTCTTCCGACAT  |
| SLC25A22  | reverse | GCTGGATCTTCAGCATCTCC  |
| SLC25A13  | forward | AAAGCAAGCCTTTGTGCAAC  |
| SLC25A13  | reverse | ATGGGATGTGGTACCTCCAG  |

**Table S2: Antibodies**

| <b>Antibodies</b>                             | <b>Company</b> | <b>Phosphorylation site</b> |
|-----------------------------------------------|----------------|-----------------------------|
| mouse monoclonal anti-KRAS                    | Santa Cruz     |                             |
| rabbit polyclonal anti-ASCT2                  | Santa Cruz     |                             |
| rabbit monoclonal anti-phospho-p44/42 kinase  | Cell Signaling | Thr202/Tyr204               |
| rabbit monoclonal anti-p44/42 kinase          | Cell Signaling |                             |
| rabbit monoclonal anti-phospho-Akt            | Cell Signaling | Ser473                      |
| rabbit monoclonal anti-Akt                    | Cell Signaling |                             |
| rabbit polyclonal anti-phospho-p70 S6 kinase  | Cell Signaling | Thr389                      |
| rabbit polyclonal anti-p70 S6 kinase          | Cell Signaling |                             |
| mouse monoclonal anti- $\beta$ -actin-oxidase | Sigma-Aldrich  |                             |
