# Supplementary material for: Clinical Role of ASCT2 (SLC1A5) in KRAS-Mutated Colorectal Cancer
Source: MDPI journal article supplement (doi:10.3390/ijms18081632), 2017-07-27

Figure S1. The analysis of KRAS knockdown in CRC cell lines. **(a)** Quantitative RT-PCR showing relative mRNA levels for KRAS. HCT116 cells (left) and DLD-1 cells (right) were treated separately with two independent siRNA constructs (#1 and #2) targeting KRAS and negative control (NC) siRNA. Mean; bars,  $\pm$  SD,  $n = 3$  (Student's  $t$ -test;  $*p < 0.05$ ); **(b)** Relative mRNA levels of SLC25A22 and SLC25A13. Mean; bars,  $\pm$  SD,  $n = 3$  (Student's  $t$ -test;  $*p < 0.05$ ).

**a**

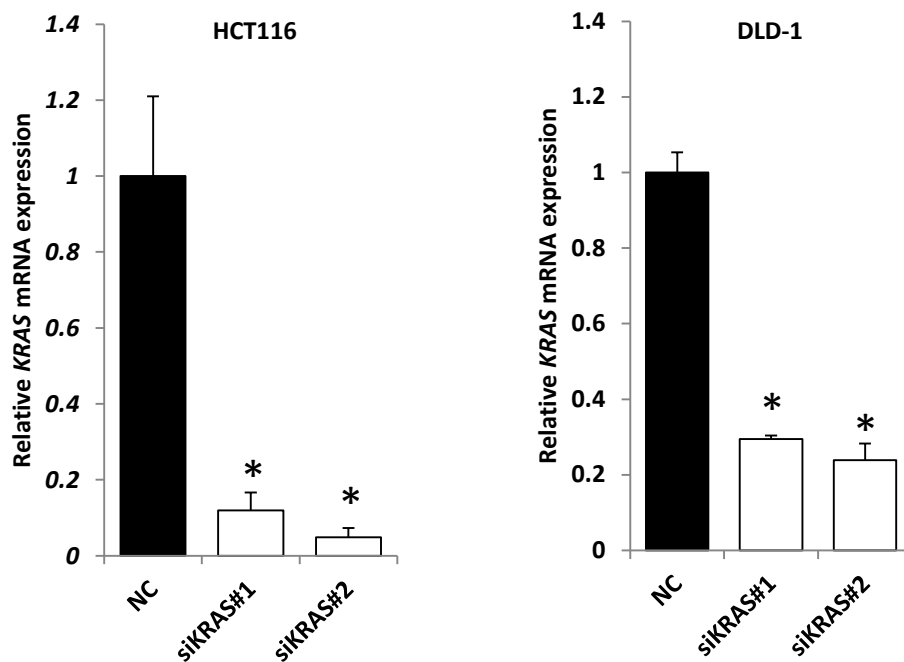

**b**

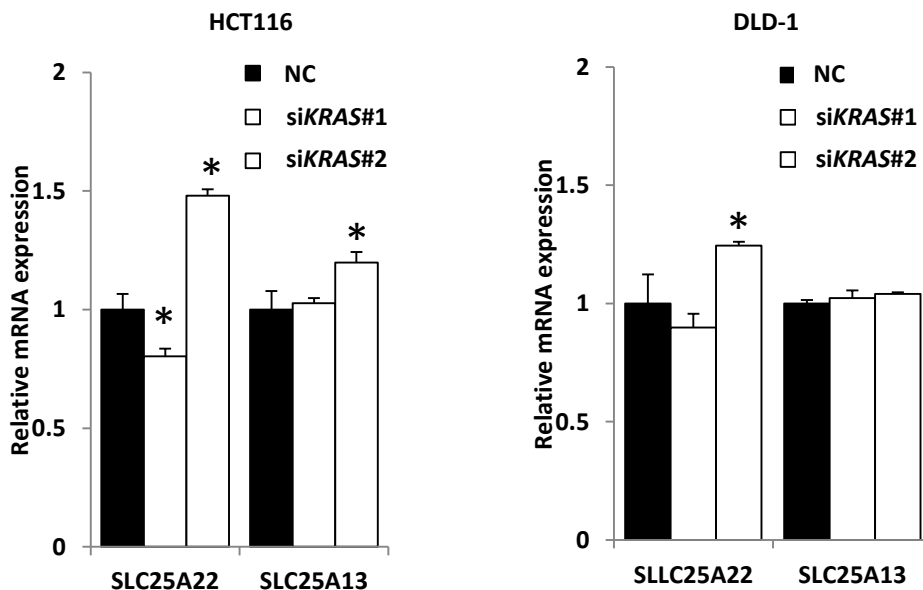

Figure S2. The effect of siSLC1A5 in colorectal cancer (CRC) cell lines. CRC cell lines were treated separately with two independent siRNA constructs (#1 and #2) targeting SLC1A5 and negative control (NC) siRNA and we performed western blotting 72hr after transfection.

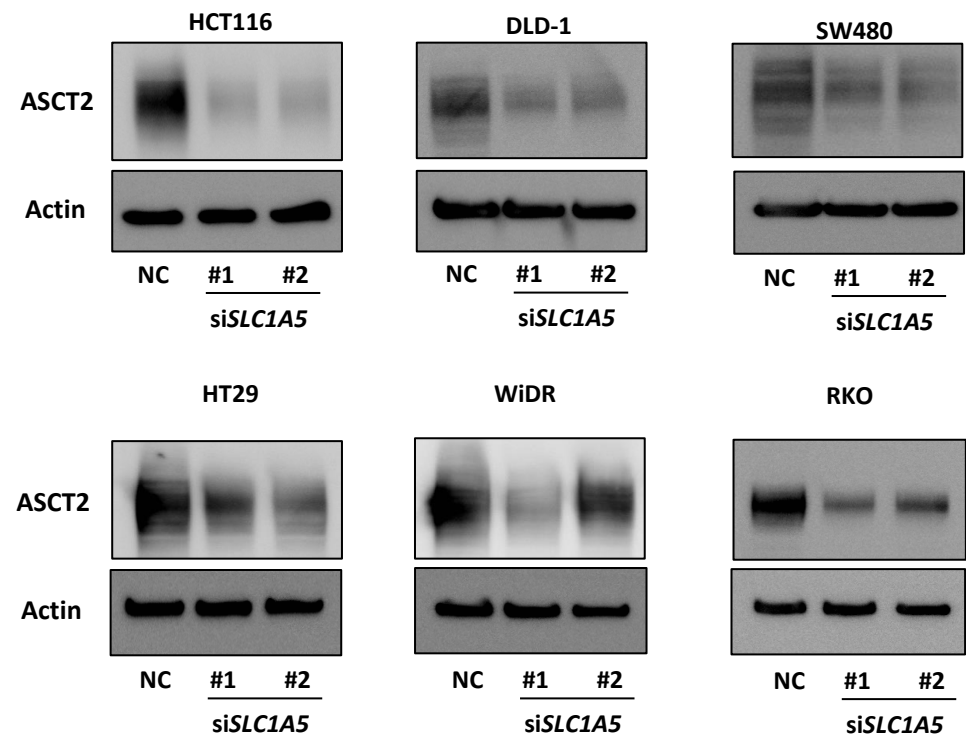

Figure S3. The effect of shSLC1A5 in HCT116. Quantitative RT-PCR (a) and western blotting (b) show the suppression of SLC1A5 (ASCT2) expression in HCT116.

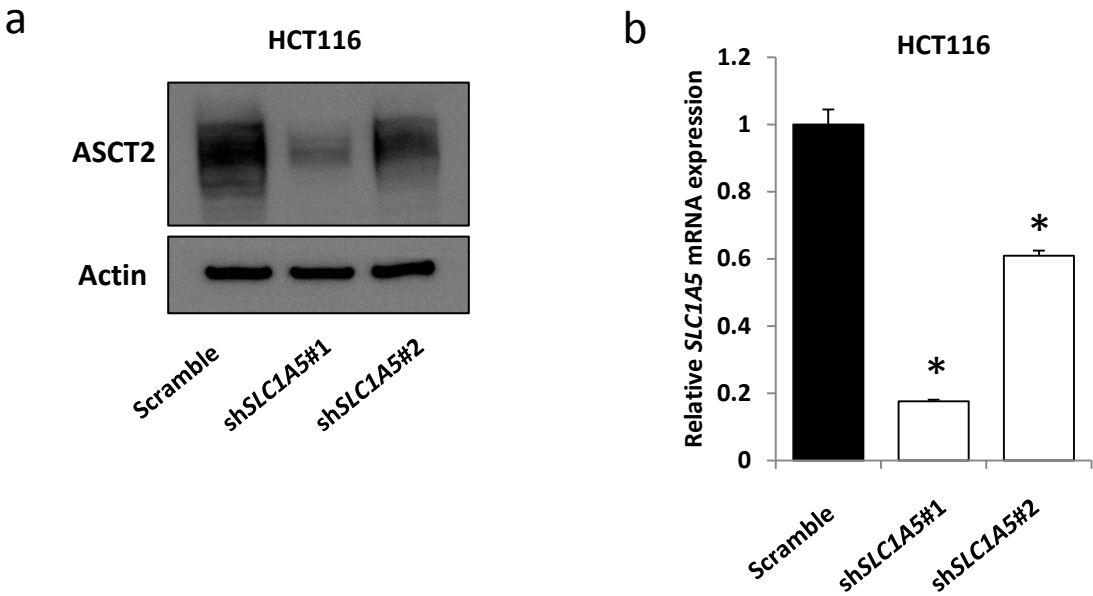

Supplement: s1 [file s1]
